# Supplementary material for: Conservation Priorities for Threatened Fish to Withstand Climate Crisis: Sustainable Capture and Protection of Inland Hydrographic Ecosystems
Source: MDPI journal article supplement (doi:10.3390/ecologies5020010), 2024-03-26
Supplement: s1 [file s1]

**Table S1: Threatened freshwater fish species of Bangladesh (source: IUCN Bangladesh, 2015)**

| Scientific Name                     | IUCN Bangladesh 2015      |                           |                     |                    |                     |        |                                            |
|-------------------------------------|---------------------------|---------------------------|---------------------|--------------------|---------------------|--------|--------------------------------------------|
|                                     | AOO<br>(km <sup>2</sup> ) | EOO<br>(km <sup>2</sup> ) | Population<br>Trend | Generation<br>Time | Total<br>population | Status | Criteria*                                  |
| <i>Anguilla bengalensis</i>         | 3161                      | 1,08,672                  | ↓                   | —                  | —                   | VU     | A2d                                        |
| <i>Gudusia chapra</i>               | 7525                      | 2,17,468                  | ↓                   | —                  | —                   | VU     | A2cd                                       |
| <i>Chela cachius</i>                | 1305                      | 78,908                    | ↓                   | —                  | —                   | VU     | A2cd                                       |
| <i>Aspidoparia morar</i>            | 1766                      | 47,768                    | ↓                   | —                  | —                   | VU     | A2c; B2ab(ii,iii)                          |
| <i>Barilius tileo</i>               | 265                       | 30,256                    | ↓                   | —                  | —                   | EN     | B2b(ii,iii,iv)c(ii)                        |
| <i>Barilius barna</i>               | 7614                      | 90,242                    | ↓                   | —                  | —                   | EN     | A2acde                                     |
| <i>Barilius bendelisis</i>          | 2980                      | 1,06,881                  | ↓                   | —                  | —                   | EN     | A2acde                                     |
| <i>Barilius vagra</i>               | 5034                      | 96,246                    | ↓                   | —                  | —                   | EN     | A2acde                                     |
| <i>Megarasbora elanga</i>           | 70021                     | 2,17,468                  | ↓                   | —                  | —                   | EN     | A2 acde                                    |
| <i>Chagunius chagunio</i>           | 812                       | 1,04,368                  | ↓                   | —                  | —                   | VU     | B2b(iii)c(ii)                              |
| <i>Crossocheilus latius</i>         | 7790                      | 77,599                    | ↓                   | —                  | —                   | EN     | A2bcd                                      |
| <i>Danio dangila</i>                | 1045                      | 44,743 k                  | ↓                   | —                  | —                   | VU     | B2ab(ii,iii,iv)                            |
| <i>Devario anomalus</i>             | 0                         | 72                        | —                   | —                  | —                   | EN     | B1+2 ab (iii)                              |
| <i>Garra annandalei</i>             | 248                       | 147                       | ↓                   | —                  | —                   | EN     | B1ab(ii,iii,iv)+2<br>ab (ii,iii,iv)        |
| <i>Garra gotyla</i>                 | 116                       | 10,549                    | ↓                   | —                  | —                   | EN     | B1ab(ii,iii,iv)+2<br>ab(ii,iii,iv)         |
| <i>Labeo ariza</i>                  | 2951                      | 14,180                    | ↓                   | —                  | —                   | VU     | B1ab(ii,iii,iv)                            |
| <i>Labeo Boga</i>                   | 2045                      | 29,885                    | ↓                   | —                  | —                   | CR     | B2 ab(ii,iii,iv)                           |
| <i>Labeo boggut</i>                 | 3454                      | 5,586                     | ↓                   | —                  | —                   | VU     | B1+2ab(iii,iv)                             |
| <i>Labeo nandina</i>                | 268                       | 17,182                    | ↓                   | —                  | —                   | CR     | A2abcd                                     |
| <i>Labeo pangusia</i>               | 743                       | 7,046                     | ↓                   | —                  | —                   | EN     | B2ab(i,ii,iii)                             |
| <i>Oreochthys cosuatis</i>          | 2987                      | 1,74,915                  | —                   | —                  | —                   | EN     | B2bc(i,ii)                                 |
| <i>Osteochilus hasseltii</i>        | 2013                      | 4,115                     | —                   | —                  | —                   | VU     | B2ab(ii,iii,iv)                            |
| <i>Pethia ticto</i>                 | 7525                      | 2,17,468                  | ↓                   | —                  | —                   | VU     | A2cd                                       |
| <i>Raiamas bola</i>                 | 2058                      | 38,598                    | —                   | —                  | —                   | EN     | A2acd                                      |
| <i>Tor putitora</i>                 | 454                       | 1,300                     | —                   | —                  | ↓                   | EN     | B1ab(i,ii,iii)+2a<br>b(i,ii,iii)           |
| <i>Tor tor</i>                      | 1763                      | 59,301                    | ↓                   | —                  | ↓                   | CR     | A2acd                                      |
| <i>Neolissochilus hexagonolepis</i> | 179                       | 3,094                     | —                   | —                  | —                   | EN     | B1b(i,ii)c(iii)                            |
| <i>Schistura sikmaiensis</i>        | 94                        | 899                       | —                   | —                  | —                   | EN     | B1ab(i,ii,iii,iv)+<br>2ab(i,ii,iii,<br>iv) |
| <i>Schistura corica</i>             | 222                       | 625                       | —                   | —                  | —                   | CR     | B1ab(i,ii,iii,iv)+<br>2ab(i,ii,iii,iv)     |
| <i>Schistura scaturigina</i>        | 831                       | 14,193                    | —                   | —                  | —                   | EN     | B1ab(i,ii,iii,iv)+<br>2ab(ii,iii,<br>iv)   |
| <i>Botia dario</i>                  | 9394                      | 83,773                    | —                   | —                  | —                   | EN     | A2ace                                      |
| <i>Botia dayi</i>                   | 8825                      | 77,892                    | ↓                   | —                  | —                   | EN     | A2ace                                      |
| <i>Botia lohachata</i>              | 3328                      | 56,252                    | ↓                   | —                  | —                   | EN     | A2ace                                      |

|                                       |       |          |   |           |   |    |                                          |
|---------------------------------------|-------|----------|---|-----------|---|----|------------------------------------------|
| <i>Lepidocephalichthys annandalei</i> | 4804  | 1,02,302 | ↓ | —         | — | VU | B1ab(i,ii,iii)                           |
| <i>Lepidocephalichthys irrorata</i>   | 1133  | 26,300   | ↓ | —         | — | VU | B1ab(i,ii,iii<br>iv)+2ab(ii,iii,iv)      |
| <i>Neoeucirrhichthys maydelli</i>     | 223   | 624      | ↓ | —         | — | CR | B1ab(i,ii,iii,iv)+<br>2ab(ii,iii,<br>iv) |
| <i>Sicamugil cascasia</i>             | 881   | 37,696   | — | —         | — | VU | B2ab(ii,iii)                             |
| <i>Chitala chitala</i>                | 6028  | 1,31,403 | ↓ | —         | — | EN | A2ce                                     |
| <i>Notopterus notopterus</i>          | 7632  | 2,17,468 | ↓ | —         | — | VU | B2b(ii,iii)c(ii)                         |
| <i>Channa barca</i>                   | 166   | 176      | — | —         | — | CR | B1ab(i,ii,iii,iv)                        |
| <i>Channa marulius</i>                | 1352  | 70254    | ↓ | —         | — | EN | A2bcd                                    |
| <i>Awaous grammepomus</i>             | 689   | 41,193   | ↓ | —         | — | VU | B2ab(iii)                                |
| <i>Eugnathogobius oligactis</i>       | 1085  | 75,283   | — | —         | — | VU | B1+2b(i,ii)                              |
| <i>Batasio tengana</i>                | 13988 | 50,252   | ↓ | —         | — | EN | A2ace                                    |
| <i>Rita rita</i>                      | 7442  | 79,633   | ↓ | —         | — | EN | A2bc                                     |
| <i>Sperata aor</i>                    | 14316 | 1,46,159 | ↓ | —         | — | VU | A2bc                                     |
| <i>Sperata seenghala</i>              | 8604  | 1,35,628 | ↓ | —         | — | VU | A2bc                                     |
| <i>Ompok bimaculatus</i>              | 70021 | 2,17,468 | ↓ | —         | — | EN | A2cde                                    |
| <i>Ompok pabda</i>                    | 11831 | 1,21,601 | ↓ | —         | — | EN | A2cd                                     |
| <i>Ompok pabo</i>                     | 5722  | 29,962   | ↓ | —         | — | CR | A2bc                                     |
| <i>Wallago attu</i>                   | 11831 | 1,21,601 | ↓ | 7-8 years | — | VU | A2cd                                     |
| <i>Clupisoma garua</i>                | 2765  | 1,73,814 | ↓ | —         | — | EN | A2bcd                                    |
| <i>Pangasius pangasius</i>            | 3676  | 2,17,486 | ↓ | —         | — | EN | A2bcd                                    |
| <i>Amblyceps laticeps</i>             | 1371  | 1,16,846 | — | —         | — | VU | B2ab                                     |
| <i>Bagarius bagarius</i>              | 8757  | 82,772   | ↓ | 7-8 years | — | CR | A2cd                                     |
| <i>Glyptothorax telchitta</i>         | 7425  | 1,27,049 | ↓ | —         | — | VU | A2bc                                     |
| <i>Sisor rabdophorus</i>              | 56    | 8,989    | — | —         | — | CR | B2ab(i,ii,iii)                           |
| <i>Chaca chaca</i>                    | 7632  | 2,17,468 | ↓ | —         | — | EN | A2ace                                    |
| <i>Olyra longicaudata</i>             | 1441  | 1,02,143 | ↓ | —         | — | EN | A2bc                                     |
| <i>Monopterusuchia</i>                | 41680 | 2,17,468 | ↓ | —         | — | VU | A2acd                                    |
| <i>Ophisternon bengalense</i>         | 7710  | 77,229   | ↓ | —         | — | VU | A2acd                                    |
| <i>Mastacembelus armatus</i>          | 7525  | 2,17,468 | ↓ | —         | — | EN | A2bc                                     |
| <i>Microphis cuncalus</i>             | 1122  | 2,24,779 | ↓ | —         | — | VU | A2ad                                     |
| <i>Microphis deocata</i>              | 1149  | 70,895   | ↓ | —         | — | VU | A2ad                                     |

**AOO = Area of occupancy; EOO = Extent of occurrence; '↓' = Decreasing/Declining/ Highly declining; '—' = Unknown/ Unavailable; VU = Vulnerable; EN = Endangered; CR = Critically endangered.**

\* The criteria of the IUCN Red List assessment guideline version 15.1. were followed to determine the conservation status of the respective species
